# 1 **CETP and SGLT2 inhibitor combination therapy improves** 2 **glycemic control**

3 Bohdan B. Khomtchouk, PhD<sup>1,2,3,4,\*</sup>; Patrick Sun, BS<sup>1</sup>; Marc Ditmarsch, MD<sup>5</sup>; John J.P.  
4 Kastelein<sup>6</sup>, MD, PhD; Michael H. Davidson, MD<sup>7</sup>

5

6 <sup>1</sup> Department of BioHealth Informatics, Luddy School of Informatics, Computing, and  
7 Engineering, Indiana University, Indianapolis, IN, USA.

8 <sup>2</sup> Center for Diabetes and Metabolic Diseases, Indiana University School of Medicine,  
9 Indianapolis, IN, USA.

10 <sup>3</sup> Krannert Cardiovascular Research Center, Indiana University School of Medicine,  
11 Indianapolis, IN, USA.

12 <sup>4</sup> Center for Computational Biology & Bioinformatics, Indiana University School of Medicine,  
13 Indianapolis, IN, USA.

14 <sup>5</sup> NewAmsterdam Pharma B.V., Naarden, 1411 DC, The Netherlands.

15 <sup>6</sup> Department of Vascular Medicine, Academic Medical Center, University of Amsterdam,  
16 Amsterdam, The Netherlands.

17 <sup>7</sup> Department of Medicine, Section of Cardiology, University of Chicago, Chicago, IL, USA.

18

19

20 *Word count: 2705*

21

22 *\*Correspondence to: Bohdan Khomtchouk, PhD, 535 W. Michigan Street, Informatics &*

23 *Communications Technology Complex (IT) 477, Indianapolis, IN 46202 USA. Email:*

24 [bokhomt@iu.edu](mailto:bokhomt@iu.edu)

**NOTE: This preprint reports new research that has not been certified by peer review and should not be used to guide clinical practice.**

## 1 **Key Points**

2 **Question:** Does combined genetic CETP and SGLT2 inhibition confer decreased glycosylated  
3 hemoglobin or diabetes incidence compared to SGLT2 inhibition alone?

4

5 **Findings:** In this cohort study, a 2x2 factorial Mendelian randomization analysis on the UK  
6 Biobank reveals that combined genetic CETP and SGLT2 inhibition is associated with  
7 decreased glycosylated hemoglobin and diabetes risk compared to both control and SGLT2  
8 inhibition alone.

9

10 **Meaning:** Our findings suggest that CETP inhibitors, which are currently in clinical trials to  
11 treat cardiovascular disease, can be repurposed to treat metabolic disease in a combination  
12 therapy approach with SGLT2 inhibitors.

13

14

15

16

17

18

19

20

21

22

23

24

25

## 1 **Abstract**

2 **Importance:** Cholesteryl ester transfer protein (CETP) inhibition has been associated with  
3 decreased risk of new-onset diabetes in past clinical trials exploring their efficacy in  
4 cardiovascular disease and can potentially be repurposed to treat metabolic disease. Notably,  
5 as an oral drug it can potentially be used to supplement existing oral drugs such as sodium-  
6 glucose cotransporter 2 (SGLT2) inhibitors before patients are required to take injectable drugs  
7 such as insulin.

8  
9 **Objective:** To identify whether CETP inhibitors could be used as an oral add-on to SGLT2  
10 inhibition to improve glycemic control.

11  
12 **Design, Setting, and Participants:** 2x2 factorial Mendelian Randomization (MR) is  
13 performed on the general population of UK Biobank participants with European ancestry.

14  
15 **Exposures:** Previously constructed genetic scores for CETP and SGLT2 function are  
16 combined in a 2x2 factorial framework to characterize the associations between joint CETP  
17 and SGLT2 inhibition compared to either alone.

18  
19 **Main Outcomes and Measures:** Glycated hemoglobin and type-2 diabetes incidence.

20  
21 **Results:** Data on 233,765 UK Biobank participants suggests that individuals with genetic  
22 inhibition of both CETP and SGLT2 have significantly lower glycated hemoglobin levels  
23 (mmol/mol) than control (Effect size: -0.136; 95% CI: -0.190 to -0.081; p-value: 1.09E-06),  
24 SGLT2 inhibition alone (Effect size: -0.082; 95% CI: -0.140 to -0.024; p-value: 0.00558), and  
25 CETP inhibition alone (Effect size: -0.08479; 95% CI: -0.136 to -0.033; p-value: 0.00118).

1 Furthermore, joint CETP and SGLT2 inhibition is associated with decreased incidence of  
2 diabetes (log-odds ratio) compared to control (Effect size: -0.068; 95% CI: -0.115 to -0.021; p-  
3 value: 4.44E-03) and SGLT2 inhibition alone (Effect size: -0.062; 95% CI: -0.112 to -0.012;  
4 p-value: 0.0149).

5

6 **Conclusions and Relevance:** Our results suggest that CETP and SGLT2 inhibitor therapy may  
7 improve glycemic control over SGLT2 inhibitors alone. Future clinical trials can explore  
8 whether CETP inhibitors can be repurposed to treat metabolic disease and provide an oral  
9 therapeutic option to benefit high-risk patients before escalation to injectable drugs such as  
10 insulin or glucagon-like peptide 1 (GLP1) receptor agonists.

## 1 Introduction

2 Metabolic disease has some of the highest medical burden in the world, with nearly 35% of  
3 people (over 100 million patients) afflicted with some form of metabolic syndrome in the  
4 United States alone, costing our healthcare system >\$250 billion annually<sup>1</sup>. Despite the  
5 extensive amount of research performed on developing treatments for metabolic disease, there  
6 is an unmet need for understanding synergies between existing treatment when used in  
7 combination therapies, which has been a major driving force behind improved outcomes in  
8 other disease areas such as oncology. Furthermore, the growing understanding of an  
9 intersection between cardiovascular and metabolic disease represents a rich knowledge base  
10 from which combination therapies using treatments from these two intersecting disease  
11 verticals can be used to develop innovative and effective therapies to achieve better outcomes.  
12 Here, we investigate whether combining the hyperlipidemia drug class of cholesteryl ester  
13 transfer protein (CETP) inhibitors with the existing hyperglycemia treatment in sodium glucose  
14 transporter 2 (SGLT2) inhibitors is an effective strategy to improve glycemic control. SGLT2  
15 inhibitors are a novel class of oral antidiabetic drugs that reduce glucose toxicity by stimulating  
16 its excretion into urine and inhibiting its reabsorption in the kidneys<sup>2,3</sup>. Because this  
17 mechanism of action is independent of insulin secretion or action, SGLT2i can be used in  
18 combination with other therapies to improve outcomes for patients afflicted with type II  
19 diabetes mellitus (T2DM)<sup>4</sup>. Circulating levels of plasma CETP reduce pancreatic  $\beta$ -cell insulin  
20 secretion by disrupting cholesterol homeostasis through accumulation of free cholesterol,  
21 which causes  $\beta$ -cell lipotoxicity and dysfunction that induces T2DM<sup>5</sup>. Therefore, CETP  
22 inhibition is one promising approach to ameliorating  $\beta$ -cell function in T2DM by decreasing  
23 islet cholesterol accumulation and inflammation<sup>5</sup>. Since CETP inhibitors (CETPi) are known  
24 to increase HDL concentrations, which are the predominant acceptors of cell cholesterol and  
25 have been reported to inhibit  $\beta$ -cell apoptosis and promote  $\beta$ -cell survival, it follows that this

1 therapeutic strategy may be important for maintaining normal  $\beta$ -cell function and insulin  
2 secretion<sup>6</sup>. Indeed, previous meta-analyses of existing randomized controlled clinical trials of  
3 CETPi therapies have shown that CETP inhibitors significantly reduce the incidence of new  
4 onset diabetes while improving glucose homeostasis and metabolism<sup>7</sup>. Therefore, in this study,  
5 we speculated that synergistic effects might be jointly induced by a combination of SGLT2i  
6 and CETPi therapy. We computationally tested this hypothesis through the design of a new  
7 2x2 factorial Mendelian randomization study comprised of 233,765 individuals from the UK  
8 Biobank. Our study builds upon and improves on prior work exploring the efficacy of  
9 combination therapies in smaller populations that focused on other clinical indications and  
10 drugs (e.g., previous efforts to genetically mimic the effects of ezetimibe and statins in 108,376  
11 people with coronary heart disease<sup>8</sup>).

12  
13  
14  
15  
16  
17  
18  
19  
20  
21  
22  
23  
24  
25

## 1 **Methods**

### 2 **Construction of genetic scores**

3 To construct a genetic score that computationally mimics the biological effects of CETP  
4 inhibitors, we build a score of 4 single-nucleotide polymorphisms (SNPs) in the CETP gene  
5 region that are strongly correlated with HDL. The genetic score uses all genotyped SNPs in  
6 the UK Biobank that were included in a CETP score described in a prior study<sup>9,10</sup>. A higher  
7 CETP genetic score mimics a greater degree of pharmaceutical CETP inhibition (Figure 1A,B).  
8 SNPs are filtered for inclusion such that they are all approximately in linkage disequilibrium  
9 (LD) with  $r^2 < 0.3$  (Supplementary Table 4 and 5).

10

11 To construct a genetic score that mimics the effects of SGLT2 inhibitors, we build a score of 2  
12 single-nucleotide polymorphisms (SNPs) in the SGLT2 gene region that are strongly correlated  
13 with SGLT2 expression. The genetic score uses all genotyped SNPs in the UK Biobank  
14 genotyping information that were included in the SGLT2 score described in Katzmann et al.,  
15 2021<sup>9,11</sup>. A higher SGLT2 genetic score mimics a greater degree of pharmaceutical SGLT2  
16 inhibition (Figure 1C,D).

17

### 18 **Instrumental variable data analysis**

19 We perform a 2x2 factorial Mendelian Randomization (MR) analysis using the UK Biobank  
20 with a focus on CETP and SGLT2-relevant datasets, as outlined in Figure 2A and Figure 2C.  
21 We include all individuals in the UK Biobank that have genotyping information containing  
22 all SNPs needed to construct the genetic scores, as well as all biomarker values. Furthermore,  
23 only white British individuals are included in the analysis to control for population  
24 stratification bias. This is performed because the SGLT2 score from Katzman et al., 2021 is  
25 validated only in the white population of the UK Biobank since the eQTLs from which they

1 were constructed were identified in a primarily white population<sup>11,12</sup>. In total, 233,765  
2 individuals fulfil our study's inclusion criteria. The final study population is then analyzed  
3 with the 2x2 factorial MR methodology detailed in Figure 2B.  
4  
5 Individuals are separated into two groups based on whether their CETP genetic score is  
6 greater than or less than the median CETP score. In each group, individuals are then  
7 separated into two additional groups based on whether their SGLT2 genetic score is greater  
8 than or less than the median SGLT2 genetic score. In total, four groups are formed. Then,  
9 the mean age, sex, HDL, LDL, TG, ApoB, weight, systolic blood pressure (SBP), glycated  
10 hemoglobin, and diabetes incidence rates are recorded for each of the four groups in both the  
11 discovery and replication cohorts. Differences in quantitative variables between groups are  
12 evaluated using linear regression and differences in diabetes incidence are calculated using  
13 logistic regression. We conduct analysis controlling for body mass index (BMI) and systolic  
14 blood pressure (SBP) using linear regression for glycated hemoglobin and logistic regression  
15 for diabetes, though analysis excluding SBP and BMI as covariates is also conducted. The  
16 covariates of BMI and SBP are included in the regression models because the SGLT2 genetic  
17 score used to mimic SGLT2 inhibition is associated with increased SBP and BMI, which is  
18 the opposite direction of effect that pharmaceutical SGLT2 inhibition has on these variables.  
19 BMI and SBP are included as covariates to ensure that the difference in glycated hemoglobin  
20 observed between groups is not due to these associations. Diabetes incidence is defined by  
21 International Classification of Diseases (ICD) codes retrieved from the electronic medical  
22 health records database associated with the UK Biobank. All individuals included in this  
23 analysis have available health records. Non-additive effects between genetic CETP and  
24 SGLT2 scores are detected through linear regressions with CETP, SGLT2, and their product  
25 (non-additive term) against glycated hemoglobin and logistic regression against diabetes



1 incidence. Interaction is detected as a significant p-value in the interaction term of the  
2 regression.

3

#### 4 **Statistical Analysis**

5 All analysis is performed in the R programming language, v4.1.0<sup>13</sup>. All visualization is  
6 performed using the ggplot2 package in R<sup>14</sup>. All hypothesis tests are two-sided and use a  
7 statistical significance level of 0.05.

8

#### 9 **Study/Ethics Approval**

10 All participants gave written informed consent prior to data collection. UK Biobank has full  
11 ethical approval from the NHS National Research Ethics Service (16/NW/0274). All  
12 methods were carried out in accordance with relevant guidelines and regulations. UK  
13 Biobank data is available to researchers upon request ([https://www.ukbiobank.ac.uk/enable-](https://www.ukbiobank.ac.uk/enable-your-research)  
14 [your-research](https://www.ukbiobank.ac.uk/enable-your-research)).

15

16

17

18

19

20

21

22

## 1 **Results**

### 2 **Confirming Genetic Score Function**

3 Pharmaceutical CETP inhibition is known to increase HDL and decrease LDL along with  
4 ApoB<sup>15,16,17,18,19</sup>. Thus, we validated whether our CETP genetic score behaved similarly to  
5 pharmaceutical CETP inhibition by seeing if elevated CETP genetic scores, corresponding to  
6 more CETP inhibition, exhibited these same relationships. This validation was performed  
7 through a dichotomous CETP score, where participants are split into high and low groups and  
8 differences in lipid biomarkers are observed, as well as through a continuous CETP score,  
9 where the score itself is regressed against HDL, LDL, and ApoB. We find both scores are  
10 strongly associated with increased HDL, decreased LDL, and decreased ApoB with p-values  
11 less than  $2 \times 10^{-16}$  for all comparisons (Figure 1A, 1B; Supplementary Table 1). Based on  
12 these results, our CETP score is likely a reasonable proxy for pharmaceutical CETP inhibition.

13  
14 Pharmaceutical SGLT2 inhibition decreases glycated hemoglobin, systolic blood pressure, and  
15 body mass index (BMI), so we validate the function of our SGLT2 genetic score based on  
16 associations with these biomarkers<sup>20,21,22,23</sup>. We perform the same analysis with dichotomous  
17 and continuous scores as detailed above to validate our CETP genetic score, finding that our  
18 SGLT2 score is associated with decreased glycated hemoglobin (dichotomized:  $p=4.26 \times 10^{-5}$ ;  
19 5; continuous:  $p=4.40 \times 10^{-5}$ ), but increased systolic blood pressure (dichotomized:  $p=0.0116$ ;  
20 continuous:  $p=0.00149$ ) with increased BMI trending towards significance (dichotomized:  
21  $p=0.172$ ; continuous:  $p=0.0708$ ) (Figure 1C, 1D; Supplementary Table 1). Based on these  
22 results, we conclude that our SGLT2 score functions as expected with respect to glycated  
23 hemoglobin, but not with respect to SBP and BMI. Since the primary mechanism of action of  
24 SGLT2 inhibition is to decrease glycated hemoglobin with decreased blood pressure and BMI  
25 as secondary effects, we believe our SGLT2 score is likely a reasonable proxy for

1 pharmaceutical SGLT2 inhibition. However, we will control for the possible confounding of  
2 the SBP and BMI associations by including them as covariates in all aspects of the following  
3 2x2 factorial Mendelian Randomization analysis. For each comparison between groups there  
4 will be two statistical tests performed: one without SBP and BMI as covariates and one  
5 including SBP and BMI as covariates.

6

### 7 **Comparison of glycated hemoglobin between groups**

8 After confirming the function of our scores and identifying SBP and BMI as possible  
9 confounders to control for, we proceed with our 2x2 factorial Mendelian Randomization  
10 analysis and split our cohort into four groups corresponding to control, SGLT2 inhibition only  
11 (SGLT2i), CETP inhibition only (CETPi), and both SGLT2 and CETP inhibition (combo  
12 therapy). We compare the levels of glycated hemoglobin between members of each group and  
13 the reference group (low CETP and low SGLT2 score). We find that both SGLT2i ( $p=0.0719$ )  
14 and CETPi ( $p=0.0549$ ) are associated with decreased glycated hemoglobin relative to control,  
15 and this signal is strengthened to statistical significance (SGLT2i:  $p=0.0087$ ; CETPi:  $p=0.044$ )  
16 when SBP and BMI are included as covariates (Figure 3A, 3B; Supplementary Table 2).  
17 Furthermore, when the non-control groups are compared against each other, no significant  
18 difference is found between the CETPi and SGLT2i groups ( $p=0.915$ ), but the combo therapy  
19 group has significantly lower glycated hemoglobin levels relative to the SGLT2i ( $p=0.00558$ )  
20 and CETPi ( $p=0.00118$ ) groups; this conclusion is recapitulated when SBP and BMI are  
21 included as covariates (CETPi vs SGLT2i:  $p=0.384$ ; Combo vs SGLT2i:  $p=0.0459$ ; Combo vs  
22 CETPi:  $p=0.00146$ ) (Figure 3C, 3D; Supplementary Table 2). Non-additive effects between  
23 genetic CETP and SGLT2 inhibition on glycated hemoglobin are not detected, as the  
24 interaction term is not significantly associated with glycated hemoglobin (Estimate:  $9.13 \times 10^{-5}$ ;  
25 95% CI: -0.0007 to 0.0007;  $p$ -value=0.98) (Supplement 9).

## 1 **Comparison of diabetes risk between groups**

2 To determine whether joint CETP and SGLT2 inhibition has an impact on diabetes risk within  
3 each of our groups, we leverage the same analytical framework as detailed above for glycated  
4 hemoglobin but use logistic regression instead of linear regression because diabetes is a binary  
5 phenotype. We find that neither CETPi nor SGLT2i are associated with decreased diabetes risk  
6 relative to control (CETPi:  $p=0.806$ ; SGLT2i:  $p=0.274$ ), but combo therapy is associated with  
7 significantly decreased diabetes risk relative to control ( $p=4.44 \times 10^{-3}$ ) (Figure 4A;  
8 Supplementary Table 3). These findings are unchanged if SBP and BMI are included as  
9 covariates (CETPi:  $p=0.446$ ; SGLT2i:  $p=0.233$ ; Combo:  $p=3.82 \times 10^{-3}$ ) (Figure 4B;  
10 Supplementary Table 3). Comparison between groups suggests that SGLT2i and CETPi do not  
11 have significantly different incidence of diabetes ( $p=0.444$ ), even though the combo therapy  
12 group is significantly associated with decreased diabetes incidence relative to SGLT2i  
13 ( $p=0.0149$ ) and is trending towards significance relative to CETPi ( $p=0.0557$ ) (Figure 4C;  
14 Supplementary Table 3). Replication of these findings is achieved when SBP and BMI are  
15 included as covariates (CETPi vs SGLT2i:  $p=0.739$ ; Combo vs SGLT2i:  $p=0.0466$ ; Combo vs  
16 CETPi:  $p=0.0609$ ) (Figure 4D; Supplementary Table 3). Non-additive effects between genetic  
17 CETP and SGLT2 inhibition on diabetes risk are not detected, as the interaction term is not  
18 significantly associated with diabetes risk (Estimate:  $-0.00233$ ; 95% CI:  $-0.008$  to  $0.004$ ;  $p$ -  
19 value= $0.454$ ) (Supplement 9). A summary of all evaluated quantities between different groups  
20 in the 2x2 factorial framework is presented in Figure 5.

21

22

23

24

25

## 1 **Discussion**

2 In this study, we have used a 2x2 factorial Mendelian Randomization framework to investigate  
3 the effects of SGLT2i and CETPi combination therapy on glycated hemoglobin levels and  
4 diabetes risk. We find that combination therapy is associated with decreased glycated  
5 hemoglobin levels compared to SGLT2i, CETPi, and control, with this conclusion robust  
6 against the inclusion of potential confounders (SBP and BMI) as covariates. The combination  
7 therapy group also had significantly lower diabetes incidence compared to both control and  
8 SGLT2i and was trending towards significance for CETPi. We detected no evidence of  
9 interactions between genetic CETP and SGLT2 inhibition on either glycated hemoglobin or  
10 diabetes risk. Taken together, these results constitute genetics-driven evidence suggesting that  
11 combination therapy with CETP and SGLT2 inhibitors confers improved protection against  
12 hyperglycemia and diabetes risk compared to SGLT2 inhibitors alone. Furthermore, the lack  
13 of interaction effect suggests that genetic CETP or SGLT2 inhibition doesn't attenuate the  
14 effect of the other on glycated hemoglobin or diabetes risk. It is important to note that since  
15 CETP and SGLT2 inhibitors are both oral drugs, their combination therapy represents an oral  
16 therapeutic strategy for treatment-resistant diabetes prior to use of injectable drugs such as  
17 insulin or glucagon-like peptide 1 (GLP1) receptor agonists<sup>24</sup>. The ease of taking oral therapy  
18 over injectable drugs could lead to higher patient compliance to drive better patient outcomes  
19 as well as lower metabolic disease morbidity. Indeed, previous investigations of medication  
20 adherence in type-2 diabetes estimate adherence of oral hyperglycemia agents to be between  
21 38% and 93%, generally higher than that of injectable hyperglycemia agents, which are  
22 between 38% and 61%<sup>25,26,27,28,29</sup>.

23

24 The cost of bringing a new drug to market is exceptionally high, costing over \$1 billion with  
25 estimates ranging as high as \$2.6 billion<sup>30,31</sup>. Beyond heavy monetary investment, developing

1 medicine to treat a disease from scratch requires a time investment of over a decade<sup>31,32</sup>.  
2 Finding ways to repurpose existing drugs into promising new clinical indications represents an  
3 efficient way to decrease drug discovery cost and development time. Critically, since CETP  
4 inhibitors such as obicetrapib are currently in phase 3 clinical trials to treat dyslipidemia and  
5 coronary artery disease, its clean safety and toxicity profile makes it a good repurposing  
6 candidate for metabolic disease and combination therapies<sup>33</sup>. Our analysis not only provides  
7 genetics-driven support for repurposing CETP inhibitors to metabolic disease in the form of a  
8 CETP and SGLT2 inhibitor combination therapy, but also highlights the power of 2x2 factorial  
9 Mendelian Randomization as a computational framework through which combination  
10 therapies across disease verticals can be systematically discovered and mined for repurposing  
11 opportunities. Previous 2x2 factorial MR studies have identified combination therapies  
12 primarily within cardiovascular disease for PCSK9 and CETP inhibition, NPC1L1 and  
13 HMGCR inhibition, and IL-6 and PCSK9/CETP/NPC1L1 inhibition<sup>8,34,35</sup>. However, our study  
14 is the first to use 2x2 factorial MR as a way to identify phase 3 cardiovascular drugs that can  
15 be repurposed for metabolic disease in a combination therapy approach. This conclusion is  
16 currently patent-pending under application number 37726-54665.

17

18 Despite the translational impact of our findings, our study is not without its limitations. The  
19 primary shortcoming of our analysis is the fact that we did not conduct a randomized double-  
20 blind placebo-controlled clinical trial, which is the gold benchmark standard, to administer  
21 pharmacologic SGLT2 or CETP inhibitors to investigate the effect of either monotherapy.  
22 Rather, we computationally analysed the effect of lifetime decreased SGLT2 or CETP  
23 function caused by genetic variation, which could differ from the shorter-acting effects of  
24 pharmaceutical therapies. Since our approach is grounded in genetics, it also doesn't account  
25 for the potential off-target effects of small molecule inhibitors of either SGLT2 or CETP,

1 which can only be achieved through a randomized control trial as mentioned above.  
2 However, our analysis does provide strong genetics-driven evidence grounded in a well-  
3 established causal inference framework that can be used to inform future clinical trials of this  
4 combination therapy. Furthermore, the actual instruments may have pleiotropic effects on  
5 glycated hemoglobin or lipid parameters independent of their effect on SGLT2 or CETP  
6 function, though we have attempted to minimize this potential source of confounding by  
7 using previously validated genetic scores from the published literature. Lastly, our analysis  
8 demonstrates the effectiveness of joint CETP and SGLT2 inhibition in a white population  
9 within the UK Biobank, but the strength and generalizability of our analysis would be  
10 increased by are more ethnically diverse data cohort, either by including all individuals in the  
11 UK Biobank or by using a more heterogeneous cohort such as the NIH *All of Us* Research  
12 Program<sup>36</sup>.

13  
14  
15  
16  
17  
18  
19  
20  
21  
22  
23  
24  
25

## 1 **Conclusion**

2 Genetically downregulated SGLT2 signaling and genetically lowered CETP activity are  
3 associated with additively lower lifetime risk of metabolic outcomes by way of significantly  
4 decreased glycated hemoglobin levels and lower incidence of type-2 diabetes. Future clinical  
5 trials should explore the protective effects of combining SGLT2 inhibitors and CETP-  
6 lowering treatments in the context of metabolic disease prevention.



## 1 **Contributions**

2 BBK, MD, JJP, MHD designed the research studies. BBK, PS acquired data. BBK, PS  
3 analyzed data and helped with data interpretation and figure generation. BBK wrote the original  
4 draft of the manuscript. All authors reviewed and edited the manuscript.

5

## 6 **Acknowledgement**

7 BBK acknowledges funding support from Indiana University and NIH R01DK132090.

8

## 9 **Disclosures**

10 BBK is the co-founder of Dock Therapeutics, Inc. JJPK and MHD are co-founders of  
11 NewAmsterdam Pharma, B.V.

## 1 **References**

- 2 1. Hirode G, Wong RJ. Trends in the prevalence of metabolic syndrome in the united states,  
3 2011-2016. *JAMA*. 2020;323(24):2526. doi:10.1001/jama.2020.4501  
4
- 5 2. Shyr ZA, Yan Z, Ustione A, Egan EM, Remedi MS. SGLT2 inhibitors therapy protects  
6 glucotoxicity-induced  $\beta$ -cell failure in a mouse model of human KATP-induced diabetes  
7 through mitigation of oxidative and ER stress. Cras-Méneur C, ed. *PLoS ONE*.  
8 2022;17(2):e0258054. doi:10.1371/journal.pone.0258054  
9
- 10 3. Heerspink HJL, Perkins BA, Fitchett DH, Husain M, Cherney DZI. Sodium glucose  
11 cotransporter 2 inhibitors in the treatment of diabetes mellitus: cardiovascular and kidney  
12 effects, potential mechanisms, and clinical applications. *Circulation*. 2016;134(10):752-772.  
13 doi:10.1161/CIRCULATIONAHA.116.021887  
14
- 15 4. DeFronzo RA. From the triumvirate to the ominous octet: a new paradigm for the  
16 treatment of type 2 diabetes mellitus. *Diabetes*. 2009;58(4):773-795. doi:10.2337/db09-9028  
17
- 18 5. Guo W, Gong Y, Fu Z, et al. The effect of cholesteryl ester transfer protein on pancreatic  
19 beta cell dysfunction in mice. *Nutr Metab (Lond)*. 2016;13(1):21. doi:10.1186/s12986-016-  
20 0082-1  
21
- 22 6. Fryirs MA, Barter PJ, Appavoo M, et al. Effects of high-density lipoproteins on pancreatic  
23  $\beta$ -cell insulin secretion. *ATVB*. 2010;30(8):1642-1648. doi:10.1161/ATVBAHA.110.207373  
24

- 1 7. Masson W, Lobo M, Siniawski D, et al. Therapy with cholesteryl ester transfer protein  
2 (Cetp) inhibitors and diabetes risk. *Diabetes & Metabolism*. 2018;44(6):508-513.  
3 doi:10.1016/j.diabet.2018.02.005  
4
- 5 8. Ference BA, Majeed F, Penumetcha R, Flack JM, Brook RD. Effect of naturally random  
6 allocation to lower low-density lipoprotein cholesterol on the risk of coronary heart disease  
7 mediated by polymorphisms in npc111, hmgcr, or both. *Journal of the American College of*  
8 *Cardiology*. 2015;65(15):1552-1561. doi:10.1016/j.jacc.2015.02.020  
9
- 10 9. Bycroft C, Freeman C, Petkova D, et al. The UK Biobank resource with deep phenotyping  
11 and genomic data. *Nature*. 2018;562(7726):203-209. doi:10.1038/s41586-018-0579-z  
12
- 13 10. Ference BA, Kastelein JJP, Ginsberg HN, et al. Association of genetic variants related to  
14 cetp inhibitors and statins with lipoprotein levels and cardiovascular risk. *JAMA*.  
15 2017;318(10):947-956. doi:10.1001/jama.2017.11467  
16
- 17 11. Katzmann JL, Mason AM, März W, et al. Genetic variation in sodium-glucose  
18 cotransporter 2 and heart failure. *Clin Pharmacol Ther*. 2021;110(1):149-158.  
19 doi:10.1002/cpt.2153  
20
- 21 12. Lonsdale J, Thomas J, Salvatore M, et al. The genotype-tissue expression (Gtex) project.  
22 *Nat Genet*. 2013;45(6):580-585. doi:10.1038/ng.2653  
23
- 24 13. R: the r project for statistical computing. Accessed April 30, 2023. [https://www.r-](https://www.r-project.org/)  
25 [project.org/](https://www.r-project.org/)

- 1 14. Wickham H. *Ggplot2: Elegant Graphics for Data Analysis*. 2nd ed. 2016. Springer  
2 International Publishing : Imprint: Springer; 2016.  
3
- 4 15. Tall AR, Rader DJ. Trials and tribulations of cetp inhibitors. *Circ Res*. 2018;122(1):106-  
5 112. doi:10.1161/CIRCRESAHA.117.311978  
6
- 7 16. Holmes MV, Smith GD. Revealing the effect of CETP inhibition in cardiovascular  
8 disease. *Nat Rev Cardiol*. 2017;14(11):635-636. doi:10.1038/nrcardio.2017.156  
9
- 10 17. Nicholls SJ, Ditmarsch M, Kastelein JJ, et al. Lipid lowering effects of the CETP  
11 inhibitor obicetrapib in combination with high-intensity statins: a randomized phase 2 trial.  
12 *Nat Med*. 2022;28(8):1672-1678. doi:10.1038/s41591-022-01936-7  
13
- 14 18. Nicholls SJ, Brewer HB, Kastelein JJP, et al. Effects of the cetp inhibitor evacetrapib  
15 administered as monotherapy or in combination with statins on hdl and ldl cholesterol: a  
16 randomized controlled trial. *JAMA*. 2011;306(19):2099-2109. doi:10.1001/jama.2011.1649  
17
- 18 19. Nicholls SJ. Cetp-inhibition and hdl-cholesterol: a story of cv risk or cv benefit, or both.  
19 *Clin Pharmacol Ther*. 2018;104(2):297-300. doi:10.1002/cpt.1118  
20
- 21 20. Kawasoe S, Maruguchi Y, Kajiya S, et al. Mechanism of the blood pressure-lowering  
22 effect of sodium-glucose cotransporter 2 inhibitors in obese patients with type 2 diabetes.  
23 *BMC Pharmacol Toxicol*. 2017;18(1):23. doi:10.1186/s40360-017-0125-x  
24
- 25 21. Cho YK, Kim YJ, Jung CH. Effect of sodium-glucose cotransporter 2 inhibitors on

- 1 weight reduction in overweight and obese populations without diabetes: a systematic review  
2 and a meta-analysis. *Journal of Obesity & Metabolic Syndrome*. 2021;30(4):336-344.  
3 doi:10.7570/jomes21061  
4
- 5 22. Teo YH, Teo YN, Syn NL, et al. Effects of sodium/glucose cotransporter 2 (Sglt2)  
6 inhibitors on cardiovascular and metabolic outcomes in patients without diabetes mellitus: a  
7 systematic review and meta-analysis of randomized-controlled trials. *JAHA*.  
8 2021;10(5):e019463. doi:10.1161/JAHA.120.019463  
9
- 10 23. Adamson C, Kondo T, Jhund PS, et al. Dapagliflozin for heart failure according to body  
11 mass index: the DELIVER trial. *European Heart Journal*. 2022;43(41):4406-4417.  
12 doi:10.1093/eurheartj/ehac481  
13
- 14 24. Armitage J, Holmes MV, Preiss D. Cholesteryl ester transfer protein inhibition for  
15 preventing cardiovascular events. *Journal of the American College of Cardiology*.  
16 2019;73(4):477-487. doi:10.1016/j.jacc.2018.10.072  
17
- 18 25. Alatorre C, Fernández Landó L, Yu M, et al. Treatment patterns in patients with type 2  
19 diabetes mellitus treated with glucagon-like peptide-1 receptor agonists: Higher adherence  
20 and persistence with dulaglutide compared with once-weekly exenatide and liraglutide:  
21 ALATORRE ET AL . *Diabetes Obes Metab*. 2017;19(7):953-961. doi:10.1111/dom.12902  
22
- 23 26. Krass I, Schieback P, Dhippayom T. Adherence to diabetes medication: a systematic  
24 review. *Diabet Med*. 2015;32(6):725-737. doi:10.1111/dme.12651

- 1 27. Mody R, Huang Q, Yu M, et al. Adherence, persistence, glycaemic control and costs  
2 among patients with type 2 diabetes initiating dulaglutide compared with liraglutide or  
3 exenatide once weekly at 12-month follow-up in a real-world setting in the United States.  
4 *Diabetes Obes Metab.* 2019;21(4):920-929. doi:10.1111/dom.13603  
5
- 6 28. Mody R, Manjelienskaia J, Marchlewicz EH, et al. Greater adherence and persistence  
7 with injectable dulaglutide compared with injectable semaglutide at 1-year follow-up: data  
8 from us clinical practice. *Clinical Therapeutics.* 2022;44(4):537-554.  
9 doi:10.1016/j.clinthera.2022.01.017  
10
- 11 29. Yu M, Xie J, Fernandez Lando L, Kabul S, Swindle RW. Liraglutide versus exenatide  
12 once weekly: persistence, adherence, and early discontinuation. *Clinical Therapeutics.*  
13 2016;38(1):149-160. doi:10.1016/j.clinthera.2015.11.017  
14
- 15 30. Wouters OJ, McKee M, Luyten J. Estimated research and development investment  
16 needed to bring a new medicine to market, 2009-2018. *JAMA.* 2020;323(9):844.  
17 doi:10.1001/jama.2020.1166  
18
- 19 31. Mohs RC, Greig NH. Drug discovery and development: Role of basic biological research.  
20 *Alzheimer's & Dementia: Translational Research & Clinical Interventions.* 2017;3(4):651-  
21 657. doi:10.1016/j.trci.2017.10.005  
22
- 23 32. Tamimi NAM, Ellis P. Drug development: from concept to marketing! *Nephron Clin*  
24 *Pract.* 2009;113(3):c125-c131. doi:10.1159/000232592  
25

- 1 33. New Amsterdam Pharma. A Placebo-Controlled, Double-Blind, Randomized Phase 3  
2 Study to Evaluate the Effect of 10mg Obicetrapib in Participants with HeFH and/or ASCVD  
3 Who Are Not Adequately Controlled by Their Lipid Modifying Therapies. [Clinicaltrials.gov](https://clinicaltrials.gov);  
4 2023. Accessed May 23, 2023. <https://clinicaltrials.gov/ct2/show/NCT05142722>  
5
- 6 34. Cupido AJ, Reeskamp LF, Hingorani AD, et al. Joint genetic inhibition of pcsk9 and cetp  
7 and the association with coronary artery disease: a factorial mendelian randomization study.  
8 *JAMA Cardiol.* 2022;7(9):955. doi:10.1001/jamacardio.2022.2333  
9
- 10 35. Georgakis MK, Malik R, Burgess S, Dichgans M. Additive effects of genetic interleukin-  
11 6 signaling downregulation and low-density lipoprotein cholesterol lowering on  
12 cardiovascular disease: a 2×2 factorial mendelian randomization analysis. *JAHA.*  
13 2022;11(1):e023277. doi:10.1161/JAHA.121.023277  
14
- 15 36. The All of Us Research Program Investigators. The “all of us” research program. *N Engl*  
16 *J Med.* 2019;381(7):668-676. doi:10.1056/NEJMsr1809937  
17  
18  
19  
20  
21  
22  
23  
24  
25

## 1 Figures

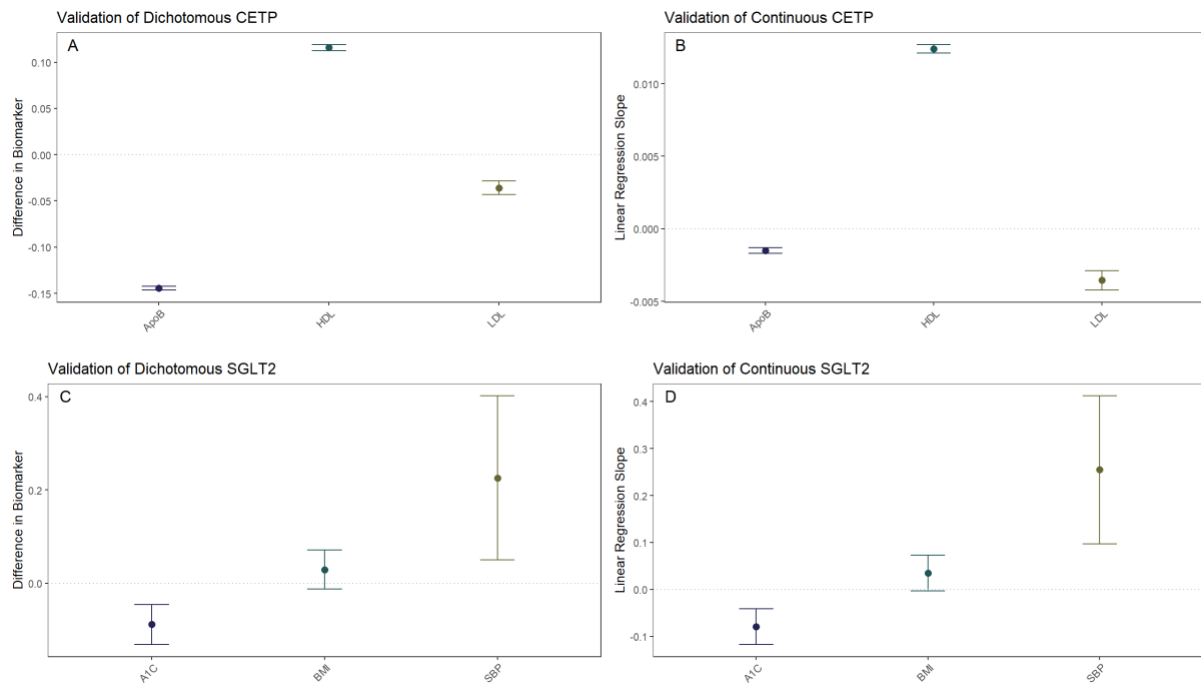

2

### 3 Figure 1: Construction of Genetic Scores

4 Both dichotomous **A**) and continuous **B**) CETP scores are associated with decreased ApoB,  
5 increased HDL, and decreased LDL. Point estimates and 95% confidence intervals are  
6 plotted for the difference between the high-CETP score group. Both dichotomous **C**) and  
7 continuous **D**) SGLT2 scores are associated with decreased hemoglobin A1c and increased  
8 systolic blood pressure, with increased BMI trending towards significance.



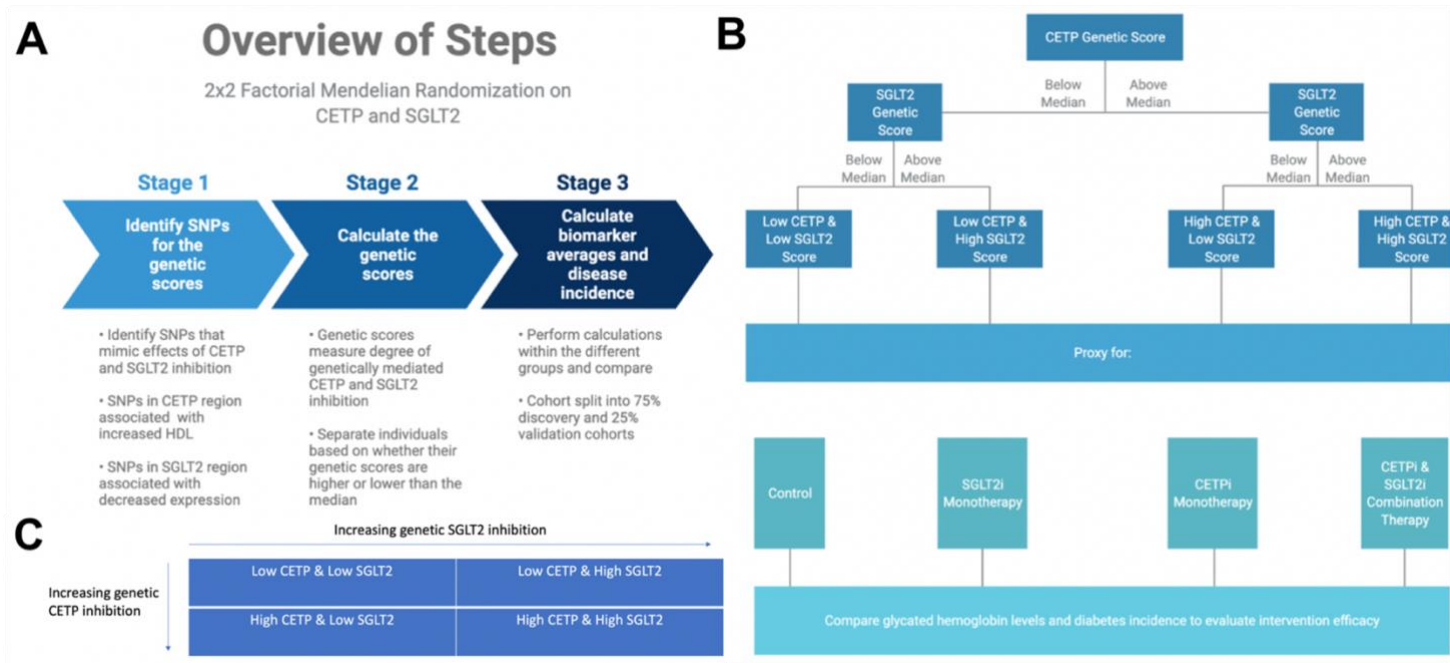

1 **Figure 2: Graphical abstract of methods overview.**

2 **A)** Overview of computational workflow for the 2x2 factorial Mendelian Randomization (MR)

3 split into 3 steps: identifying SNPs for the genetic scores that mimic effects of CETP and

4 SGLT2 inhibition, calculating the genetic scores, calculating biomarker averages and disease

5 incidence for each of the four groups. **B)** Description of allocating individuals into one of the

6 four groups: Low CETP and low SGLT2 score, low CETP and high SGLT2 score, high CETP

7 and low SGLT2 score, and high CETP and high SGLT2 score. The same 2x2 factorial MR

8 methods were conducted with each group. **C)** Once genetic scores were obtained and

9 individuals separated into one of the four aforementioned groups, a 2x2 factorial MR analysis

10 was performed using UK Biobank with a focus on CETP and SGLT2-relevant datasets

11 comprising 233,765 unique individuals.

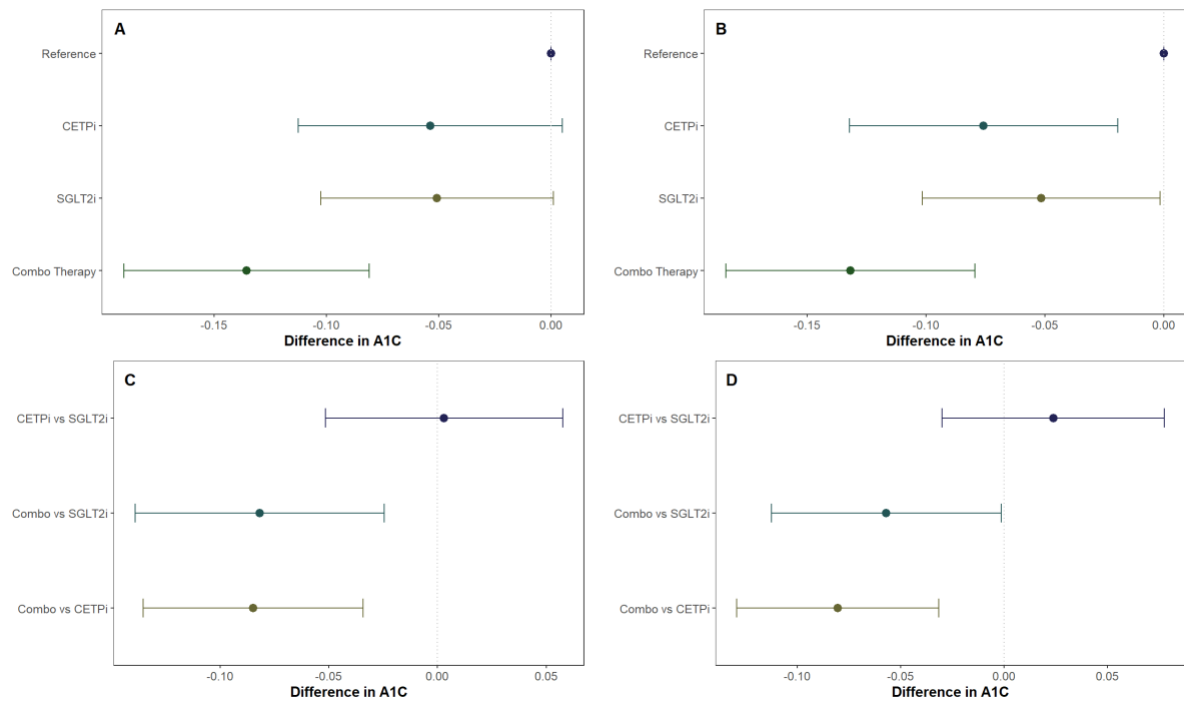

1

2 **Figure 3:** All groups in the 2x2 factorial Mendelian Randomization framework are compared  
3 against control to see if they have lower glycated hemoglobin levels. This is performed **A)**  
4 without SBP and BMI as covariates and **B)** with SBP and BMI as covariates. Non-control  
5 groups are then compared with each other **C)** without SBP and BMI as covariates and **D)** with  
6 SBP and BMI as covariates.

7

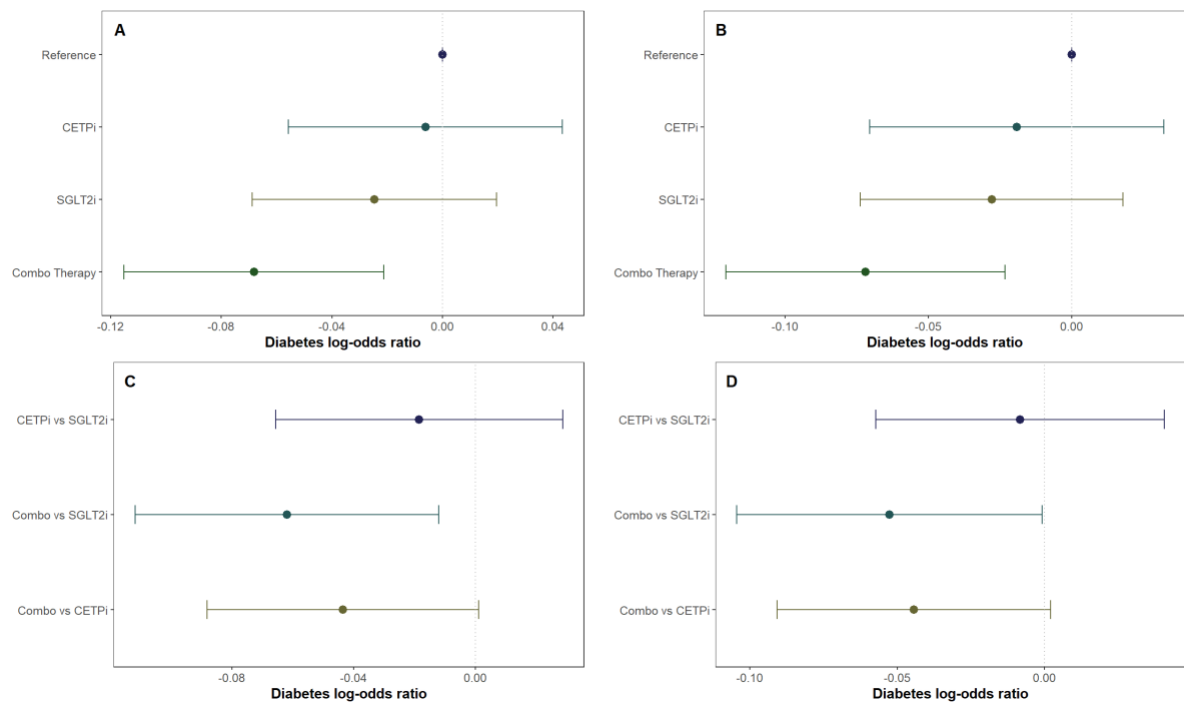

1

2 **Figure 4:** All groups in the 2x2 factorial Mendelian Randomization framework are compared  
3 against control to see if they have lower diabetes incidence. This is performed **A)** without  
4 SBP and BMI as covariates and **B)** with SBP and BMI as covariates. Non-control groups are  
5 then compared with each other **C)** without SBP and BMI as covariates and **D)** with SBP and  
6 BMI as covariates.

|                                     | Reference          | SGLT2i             | CETPi              | Combo              |
|-------------------------------------|--------------------|--------------------|--------------------|--------------------|
| <b>Demographics</b>                 |                    |                    |                    |                    |
| No. of Participants                 | 57 114             | 45 491             | 72 986             | 58 174             |
| Age                                 | 56.84 (8.02)       | 56.91 (7.98)       | 56.86 (7.99)       | 56.82 (8.02)       |
| Number Male (%)                     | 26 316 (46.1)      | 20 866 (45.9)      | 33 597 (46.0)      | 26 757 (46.0)      |
| Number Female (%)                   | 30 798 (53.9)      | 24 625 (54.1)      | 39 389 (54.0)      | 31 417 (54.0)      |
| <b>Smoking</b>                      |                    |                    |                    |                    |
| Never (%)                           | 30 628 (53.6)      | 24 680 (54.3)      | 39 797 (54.5)      | 31 481 (54.1)      |
| Previous (%)                        | 20 461 (35.8)      | 16 006 (35.2)      | 25 556 (35.0)      | 20 450 (35.2)      |
| Current (%)                         | 20 461 (10.2)      | 4 632 (10.2)       | 7 401 (10.1)       | 6 033 (10.4)       |
| Prefer not to answer (%)            | 196 (0.34)         | 173 (.38)          | 232 (0.32)         | 210 (0.36)         |
| <b>Alcohol</b>                      |                    |                    |                    |                    |
| Daily or almost daily (%)           | 12 185 (21.3)      | 9 732 (21.4)       | 15 477 (21.2)      | 12 615 (21.7)      |
| Three of four times a week (%)      | 13 744 (24.1)      | 10 953 (24.1)      | 17 618 (24.1)      | 13 867 (23.8)      |
| Once or twice a week (%)            | 15 069 (26.4)      | 12 036 (26.5)      | 19 260 (26.4)      | 15 279 (26.3)      |
| One to three times a month (%)      | 6 385 (11.2)       | 5 008 (11.0)       | 8 027 (11.0)       | 6 506 (11.2)       |
| Special occasions only (%)          | 5 960 (10.4)       | 4 809 (10.6)       | 7 738 (10.6)       | 6 065 (10.4)       |
| Never (%)                           | 3 736 (6.5)        | 2 926 (6.4)        | 4 808 (6.6)        | 3 811 (6.6)        |
| Prefer not to answer (%)            | 35 (0.06)          | 27 (0.06)          | 58 (0.08)          | 31 (0.05)          |
| <b>Medication Use</b>               |                    |                    |                    |                    |
| Lipid lowering therapy (%)          | 10 933 (19.1)      | 8 801 (19.3)       | 13 264 (18.2)      | 10 676 (18.4)      |
| Blood pressure lowering therapy (%) | 12 574 (22.0)      | 10 058 (22.1)      | 15 810 (21.7)      | 12 498 (21.5)      |
| Insulin therapy (%)                 | 378 (0.66)         | 307 (0.68)         | 450 (0.62)         | 340 (0.58)         |
| <b>Lipids</b>                       |                    |                    |                    |                    |
| HDL                                 | 1.39 (0.36)        | 1.40 (0.36)        | 1.50 (0.39)        | 1.50 (0.39)        |
| LDL                                 | 3.60 (0.86)        | 3.60 (0.86)        | 3.57 (0.85)        | 3.56 (0.85)        |
| TG                                  | 1.76 (0.99)        | 1.76 (1.00)        | 1.72 (0.97)        | 1.72 (0.97)        |
| ApoB                                | 1.04 (0.24)        | 1.04 (0.24)        | 1.03 (0.24)        | 1.03 (0.24)        |
| <b>Non-lipid biomarkers</b>         |                    |                    |                    |                    |
| Glycated hemoglobin                 | 35.58 (4.77)       | 35.52 (4.76)       | 35.53 (4.72)       | 35.44 (4.68)       |
| Body mass index                     | 27.36 (4.70)       | 27.42 (4.70)       | 27.36 (4.70)       | 27.33 (4.70)       |
| Systolic blood pressure             | 140.00 (19.59)     | 140.37 (19.72)     | 139.97 (19.61)     | 140.10 (19.62)     |
| <b>Genetic scores</b>               |                    |                    |                    |                    |
| CETP score                          | 13.93 (3.50)       | 13.90 (3.53)       | 22.41 (2.92)       | 22.44 (2.92)       |
| SGLT2 score                         | 0.56 (0.27)        | 1.47 (0.15)        | 0.56 (0.27)        | 1.47 (0.15)        |
| <b>Diabetes cases (%)</b>           | <b>3806 (6.67)</b> | <b>3014 (6.63)</b> | <b>4753 (6.51)</b> | <b>3637 (6.25)</b> |

1

2 **Figure 5: Regression of genetic scores against biomarkers.**

3 Demographic, biomarker, genetic score, and diabetes data differences between the different

4 groups included in the 2x2 factorial Mendelian randomization design.
